# Supplementary material for: Alternating Current Electrospinning of Polycaprolactone/Chitosan Nanofibers for Wound Healing Applications
Source: MDPI journal article supplement (doi:10.3390/polym16101333), 2024-05-09
Supplement: s1 [file s1]

## Supplementary material

# Alternating Current Electrospinning of Polycaprolactone/Chitosan Nanofibers for Wound Healing Applications

Jon Andrade del Olmo <sup>1,\*</sup>, Petr Mikeš <sup>2</sup>, Nikifor Asatiani <sup>2</sup>, José María Alonso <sup>1</sup>, Virginia Sáez Martínez <sup>1</sup> and Raúl Pérez González <sup>1</sup>

<sup>1</sup> i+Med S. Coop., Alava Technology Park, Albert Einstein 15, nave 15, 01510 Vitoria-Gasteiz, Spain; jalonso@imasmed.com (J.M.A.); vsaez@imasmed.com (V.S.M.); rperez@imasmed.com (R.P.G.)

<sup>2</sup> Department of Physics, Faculty of Science, Humanities and Education, Technical University of Liberec, Studentská 1402/2, 461 17 Liberec, Czech Republic

\* Correspondence: jandrade@imasmed.com

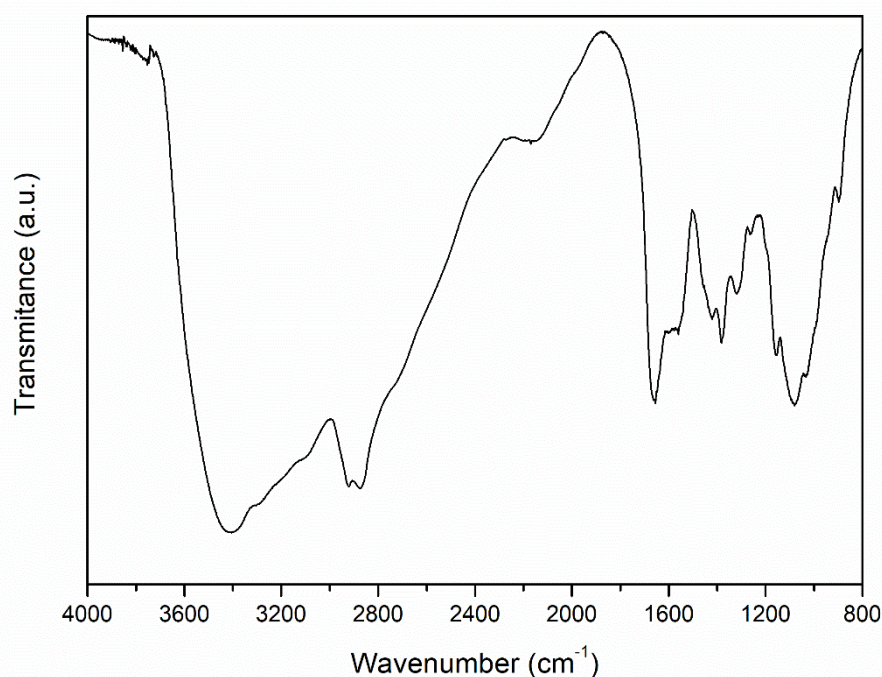

**Figure S1.** FTIR spectra of pure CHI used to fabricate PCL/CHI nanofibers.

**Table S1.** Atomic compositions (%) of electrospun PCL and PCL/CHI nanofibers obtained by XPS.

| Sample              | Atomic composition (%) |                 |                 |
|---------------------|------------------------|-----------------|-----------------|
|                     | C <sub>1s</sub>        | O <sub>1s</sub> | N <sub>1s</sub> |
| PCL (●)             | 74.90                  | 25.10           | -               |
| PCL/CHI_9/1_20 (●)  | 75.91                  | 24.09           | -               |
| PCL/CHI_9/1_100 (●) | 72.19                  | 27.81           | -               |
| PCL/CHI_9/1_600 (●) | 77.42                  | 22.58           | -               |
| PCL/CHI_8/2_20 (●)  | 75.38                  | 24.28           | 0.34            |
| PCL/CHI_8/2_100 (●) | 85.01                  | 14.41           | 0.58            |
| PCL/CHI_8/2_600 (●) | 73.12                  | 26.27           | 0.61            |
| PCL/CHI_7/3_20 (●)  | 77.31                  | 22.28           | 0.40            |
| PCL/CHI_7/3_100 (●) | 72.79                  | 26.61           | 0.60            |
| PCL/CHI_7/3_600 (●) | 69.86                  | 29.38           | 0.76            |

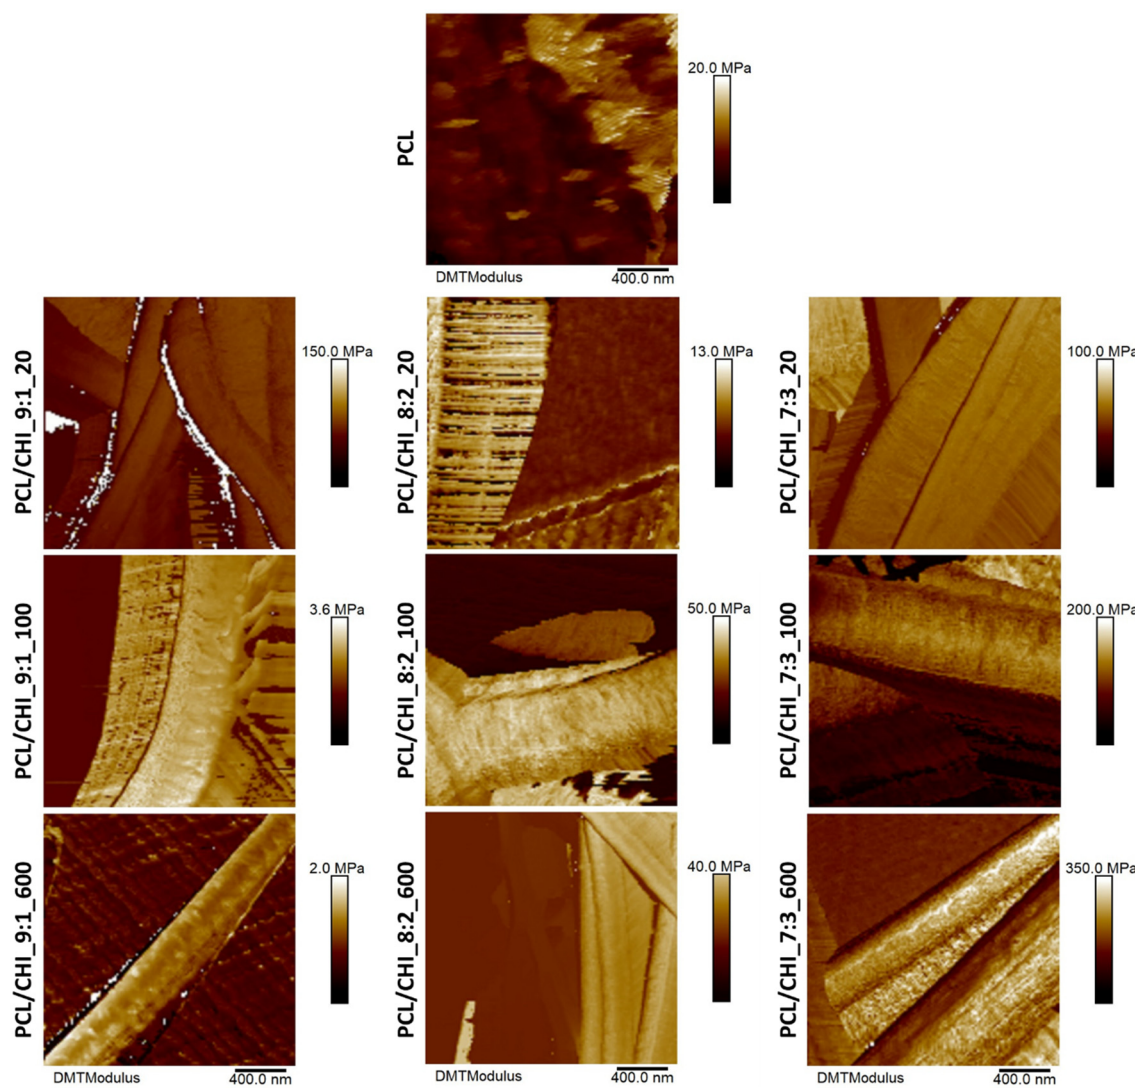

**Figure S2.** High-resolution AFM channels with obtained nanomechanical properties of synthesized PCL and PCL/CHI nanofibers.
